# Supplementary material for: What is a research derived actionable tool, and what factors should be considered in their development? A Delphi study
Source: Springer Nature journal article supplement (doi:10.1186/s12913-018-3551-6), 2018-09-27
Supplement: MOESM2 [file 16157148]

# Determining the type of Actionable Tools that can be developed from NIHR research findings: A Delphi Study

Welcome to the second Delphi survey which is considerably shorter than the first round. Once again, we would like to thank you for your considered responses which encompassed both practical and philosophical insight. We have used this insight to develop this next round. A brief summary of our findings can be found in the covering email.

This study is concerned with identifying and depositing products from NIHR funded research into an e-repository with aim of closing the Knowledge-Action gap.

This second round then focuses on refining our definition as it was considered to be too abstract for the intended audience. We had consensus that an actionable tool would have the elements we identified but our analysis of your contributions also identified that there may be other considerations. We have asked additional questions about this.

As a reminder, the Delphi panel, you have joined, consists of both academics and practitioners with an interest in and /or experience of getting evidence into practice.

## INSTRUCTIONS

Generally, questions in this survey use a Likert scale where 1 = strongly agree and 5 = strongly disagree. There are also a number of open questions.

\* Required

## Section 1: A clearer definition

---

We were near consensus with the definition used in the last round but were advised by the panel, that the language we used, was too academic and may be off putting to our audience. We have, therefore, developed a new definition drawing on the numerous suggestions of the Delphi Panel. We have retained central concepts around elements as we gained clear consensus on these issues.

### OUR NEW DEFINITION

A research derived actionable tool is a product informed by research study findings that is intended to change the way of thinking, promote decision making or instigate action around an issue. Actionable tools are characterised by:

RESEARCH KNOWLEDGE : you can recognise the research findings within the tool.

MEANS of COMMUNICATION: the approach to communicating the findings shows consideration of the target audience, and how they prefer to receive information.

PROMPT: the tool invites the target audience to reflect on the research findings and triggers appropriate action within the local setting.

### 1. To what extent do you agree with the above definition? \*

1 = strongly agree, 5 = strongly disagree

Mark only one oval.

|                |                       |                       |                       |                       |                                         |
|----------------|-----------------------|-----------------------|-----------------------|-----------------------|-----------------------------------------|
| 1              | 2                     | 3                     | 4                     | 5                     |                                         |
| strongly agree | <input type="radio"/> | <input type="radio"/> | <input type="radio"/> | <input type="radio"/> | <input type="radio"/> strongly disagree |

**2. Please explain your reasons**

---



---



---



---



---

**Section 2: other considerations**

Your responses have highlighted that there are other factors which may be worth consideration in the shaping, content and dissemination of such tools.

We have organised these considerations into two themes; considerations which are about the NIHR research study itself and considerations around the research derived product.

We ask you to consider how important these considerations are to potential end users of the tool.

**The research itself**

---

**3. To what extent do you agree that the following considerations are important to end users of an actionable tool?**

*Mark only one oval per row.*

|                                                                    | strongly agree        | agree                 | neither agree nor disagree | disagree              | strongly disagree     |
|--------------------------------------------------------------------|-----------------------|-----------------------|----------------------------|-----------------------|-----------------------|
| the research funding body                                          | <input type="radio"/> | <input type="radio"/> | <input type="radio"/>      | <input type="radio"/> | <input type="radio"/> |
| the research team that has undertaken the work                     | <input type="radio"/> | <input type="radio"/> | <input type="radio"/>      | <input type="radio"/> | <input type="radio"/> |
| the institution(s) that has/have undertaken the work               | <input type="radio"/> | <input type="radio"/> | <input type="radio"/>      | <input type="radio"/> | <input type="radio"/> |
| the setting/ context of the research study                         | <input type="radio"/> | <input type="radio"/> | <input type="radio"/>      | <input type="radio"/> | <input type="radio"/> |
| the methods used                                                   | <input type="radio"/> | <input type="radio"/> | <input type="radio"/>      | <input type="radio"/> | <input type="radio"/> |
| explanation as to what the study adds to the evidence base         | <input type="radio"/> | <input type="radio"/> | <input type="radio"/>      | <input type="radio"/> | <input type="radio"/> |
| explanation of the reasoning underpinning the chosen study methods | <input type="radio"/> | <input type="radio"/> | <input type="radio"/>      | <input type="radio"/> | <input type="radio"/> |

**4. Please explain your reasons**

---



---



---



---



---

**The tool itself**

---

**5. To what extent do you agree that the following considerations are important to end users of an actionable tool?**

Mark only one oval per row.

|                                                                                                  | strongly agree        | agree                 | neither agree nor disagree | disagree              | strongly disagree     |
|--------------------------------------------------------------------------------------------------|-----------------------|-----------------------|----------------------------|-----------------------|-----------------------|
| information about who needs to take action                                                       | <input type="radio"/> | <input type="radio"/> | <input type="radio"/>      | <input type="radio"/> | <input type="radio"/> |
| ability to tailor to the local context                                                           | <input type="radio"/> | <input type="radio"/> | <input type="radio"/>      | <input type="radio"/> | <input type="radio"/> |
| information about outcomes measures that might be used as part of putting the tool into practice | <input type="radio"/> | <input type="radio"/> | <input type="radio"/>      | <input type="radio"/> | <input type="radio"/> |
| information about the support available to implement the tool                                    | <input type="radio"/> | <input type="radio"/> | <input type="radio"/>      | <input type="radio"/> | <input type="radio"/> |
| testimonies from other users                                                                     | <input type="radio"/> | <input type="radio"/> | <input type="radio"/>      | <input type="radio"/> | <input type="radio"/> |
| self assessment guidance for using the tool                                                      | <input type="radio"/> | <input type="radio"/> | <input type="radio"/>      | <input type="radio"/> | <input type="radio"/> |
| includes evaluation tools                                                                        | <input type="radio"/> | <input type="radio"/> | <input type="radio"/>      | <input type="radio"/> | <input type="radio"/> |
| prioritises the actions                                                                          | <input type="radio"/> | <input type="radio"/> | <input type="radio"/>      | <input type="radio"/> | <input type="radio"/> |
| timescales for implementation                                                                    | <input type="radio"/> | <input type="radio"/> | <input type="radio"/>      | <input type="radio"/> | <input type="radio"/> |

**6. Please explain your reasons**

---



---



---



---



---

**7. Finally, we intend to publish our findings and need to know if you are willing to be acknowledged in these publications?**

Mark only one oval per row.

|                                     | Yes                   | No                    | Unsure (please contact me to discuss) |
|-------------------------------------|-----------------------|-----------------------|---------------------------------------|
| Report to NHS England (our funders) | <input type="radio"/> | <input type="radio"/> | <input type="radio"/>                 |
| Academic journals                   | <input type="radio"/> | <input type="radio"/> | <input type="radio"/>                 |
| Academic conferences                | <input type="radio"/> | <input type="radio"/> | <input type="radio"/>                 |
| Blogs                               | <input type="radio"/> | <input type="radio"/> | <input type="radio"/>                 |

**Thank you once again for your help with this work.**
